# Supplementary material for: Spatially resolved transcriptomic profiles reveal unique defining molecular features of infiltrative 5ALA-metabolizing cells associated with glioblastoma recurrence
Source: Genome Med. 2023 Jul 11;15:48. doi: 10.1186/s13073-023-01207-1 (PMC10337060; doi:10.1186/s13073-023-01207-1)
Supplement: Supplementary file 4 — Additional file 4: Table S3. Neural cell type GSEA and leading gene-edge gene list. [file 13073_2023_1207_MOESM4_ESM.xlsx]

## Sheet: Tumor core
Cell types enriched in tumor core	pval	padj	NES	size	leadingEdge
OLIGODENDROCYTES_CAHOY ET AL	3.52459e-10	1.05738e-09	1.49269	1087	SLC6A8 USP48 NEDD1 BNIP3L CDON GMCL1 LYSMD3 ZZZ3 TMEM106B RC3H1 PEX1 SASS6 SLC35A3 APH1A CCNT2 PRPF40A RBM28 RBM22 PCM1 SNX13 SOCS5 MKRN1 RPS27 USP36 CCNL2 DCTN4 HERPUD2 SLC4A2 RAB8B PUS7 MTIF2 PIK3C2A CSNK1G3 STYX RBM41 DDX59 LSM5 ANKRD49 CDADC1 SNX6 VPS54 RIOK3 STX17 STARD3NL MTF1 BET1 DUSP11 BRWD3 TMEM123 THAP1 FIGNL1 ANKRD28 YTHDF3 GTF2H1 CCT4 ANKIB1 SYNCRIP CYP20A1 CRLF3 BRAF PNPT1 RBM39 SMA…
NEURON_CAHOY ET AL	0.00420147	0.00560196	1.10866	1036	ME3 DHX57 TARDBP RTF1 YKT6 CLSTN3 NUDCD3 DPYSL3 SMARCA1 SPIN1 LMBR1 ABI2 YWHAG SSX2IP NRSN2 BRD8 CMAS PJA1 ELP3 PNMA2 ACTR3B REEP2 ATP8B2 STMN3 ZYG11B MPP3 MTMR9 RNF14 ARF3 SMYD5 LMTK2 SERBP1 IKZF4 GEMIN6 DNM1L FADS3 MYH10 ARPP19 AP3M2 PDIK1L RBM43 SRPK2 CACNB3 DLGAP4 FADD CCNT2 TMEM181 KIF3A NCALD ZIK1 OSBPL5 HSDL1 USP33 FBXO45 USP46 PHF13 MARK1 TUBG2 ERC1 GOLT1B DENR ACO1 TERF2 KLHL12 SS18L1 BB…
ASTROCYTES_CAHOY ET AL	1e-10	4e-10	1.4813	1314	XPOT TGDS SLC30A7 PTPN12 CHCHD3 TMEM43 PROS1 LRCH3 GOLGA1 ETAA1 RRAGD SEC63 SH3PXD2B E2F6 LMAN1 NSMAF YES1 TRMT11 PRRX1 NMNAT1 RYK VCL SSR3 STAT3 PIK3CA NBN HIPK1 VIM PLOD2 SUZ12 TAX1BP1 DUSP11 CAPN7 TBCEL SLC33A1 NGLY1 ZBTB41 MAPKAP1 USP40 IMPACT HSPA5 WSB1 CAPN2 TOP1 DERL1 CAD GOLPH3 KLHL24 MTFR1 XRCC5 SCP2 PGGT1B BFAR SAP30 PPIG CROT DHX33 GLB1L TMEM161B DLG5 ABHD4 CRTC3 AK3 DNAJB9 MANEA CNOT1…
CULTURED ASTROGLIA_CAHOY ET AL	1.42891e-06	1.90521e-06	1.27812	1098	CLIC4 VAT1 ZMYM1 WDR36 NUP107 MIS12 TMEM43 TMEM123 PROS1 PSMD5 LYSMD3 STT3A SNX7 RBM43 XPO1 LMAN1 GOLT1B ARF4 STK3 NSUN2 CSNK1A1 CTNNAL1 EXOC4 NOL10 STAT3 XRN1 NCBP2 NUP205 NPM1 VIM ATP13A3 PLOD2 CALD1 NCK1 BZW1 RAD50 PAPOLA UFM1 FIGNL1 CCNG1 CTTNBP2NL SCYL2 ABL1 RAD23B TRIP12 ADAM9 SNX16 XRCC5 TMEM45A MFSD9 SAP30 DPYSL3 SRP54 CCT8 FBXW2 FCF1 GATAD2A CCDC112 MSTO1 DDX41 TSN SAV1 RAB8B PDIA5 SGPL1…

## Sheet: Tumor rim
Cell types enriched in tumor rim	pval	padj	NES	size	leadingEdge
OLIGODENDROCYTES_CAHOY ET AL	0.00305235	0.0040698	1.22911	1087	VAT1 TPST1 CLIC4 ITGB4 MAN1C1 ARF4 STT3A GATAD2A REXO2 TBC1D23 SEC24A NCBP2 TXLNA CALD1 LRRC42 MAP3K7 TMEM182 PRRC1 PAM CTNNAL1 MCAM ABHD4 BET1 LMAN1 SCFD2 CDV3 RBM28 PES1 FYN USP36 RIOK2 GNPNAT1 SRP54 NAT9 RAD23B EDEM3 AFAP1L1 BICD1 RDX ADAM12 ABL1 TMEM163 ITPR2 BNIP3L ELOVL6 TMED10 DPY19L1 PYCR1 ZNRF1 STARD3NL FUBP3 EAF1 ALDH9A1 MPZL1 PCOLCE2 CPD SAMD4B EIF2S2 SYNCRIP PLOD2 SLC25A38 ITGB1 PCYT1…
NEURON_CAHOY ET AL	1.43816e-05	2.87631e-05	1.18705	1036	SMARCA1 ACHE REEP2 ME3 YKT6 PGM2L1 NRSN2 TRPC1 NUDCD3 LMBR1 OLFM2 RBM43 TUBG2 ARF3 FADS3 HOOK2 TARDBP FBXO45 FNBP1L GAP43 ACO1 PHF13 DPYSL3 CMAS FIBCD1 MARK1 PJA1 ELP3 DLGAP4 AP3M2 SERBP1 STMN3 CACNB3 XPR1 TLK1 ABI2 SLC7A1 RGS17 SLC4A3 SNX16 VGF NCALD DHX57 FADD SMYD5 MPP3 FILIP1 PNMA2 BBS4 NAT14 SPIN1 NTNG1 BRD8 YTHDF1 RNF14 RTF1 RBBP7 CACNB1 ZIK1 ATP8B2 CLSTN3 DGKG KLHDC8A INHA SYNPO SEC23A GOL…
ASTROCYTES_CAHOY ET AL	1e-10	3.82076e-10	1.60606	1314	NRP2 RDH10 ISLR VCL RSU1 CLU F3 NOTCH3 HRH1 SERPINH1 STAT3 TRIM47 CTTN TNC EHD2 LAMB2 EMP1 SH3PXD2B VIM NEK6 SLC33A1 TMEM43 PDZD11 PROS1 FGFR1 XPOT CD44 ACTB SSR3 HSD3B7 MAPKAP1 LMCD1 TBL1X CAPN2 IFNAR1 AK3 PTPN12 P4HA2 PARP3 ABHD4 CROT LRCH3 PPP1R3C TGDS SEC63 DERL1 C1QTNF6 GPR19 GDPD2 LMAN1 SLC30A7 MICALL2 PTPN9 HSPA5 PIGO BFAR PRRX1 MFHAS1 CNN3 MTFR1 EEA1 PDPN GLB1L ITPKB CHI3L1 PNPLA7 PGGT1B …
CULTURED ASTROGLIA_CAHOY ET AL	1.91038e-10	3.82076e-10	1.50655	1098	VAT1 CLIC4 MAN1C1 ACTN1 FADS3 RDH10 ARF4 ISLR RSU1 PODXL STAT3 CTTN FBLIM1 PDLIM1 PDIA5 EHD2 EMP1 VIM STT3A GATAD2A NEK6 REXO2 TMEM43 STK3 CTF1 PROS1 EFNB1 NCBP2 SNAI2 CD44 CALD1 COL4A1 ATP13A3 NSUN2 GAP43 PARP3 CTNNAL1 MCAM TGFB1I1 NOL10 ME3 COLEC12 MSRB3 PSMD5 TPM2 DNAJB5 LMAN1 SMAD1 SLC41A2 CSNK1D PSMC1 NID1 KCTD10 CNN3 PDPN VAV2 ARRDC4 DDX41 ARHGAP1 GNPNAT1 SNX16 TM4SF1 SRP54 PDLIM7 NAT9 CD34…

## Sheet: Invasive region
Cell types enriched in invasive region	pval	padj	NES	size	leadingEdge
OLIGODENDROCYTES_CAHOY ET AL	1e-10	1.5e-10	1.54864	1087	B3GAT1 KCNJ10 ACSS2 HIP1R SPATA2 FECH ACY3 PIK3C2A SC5D GNG7 SPECC1 FEZ1 RCBTB1 IPO13 TDRD7 MAPK8IP1 PTPN11 PTPRD HINT3 LSS MVK DYNC1LI2 MTUS1 PARP1 PAPSS1 SCCPDH TYRO3 GMFB MRPL48 SGPP1 ADI1 SOS2 PLEKHB1 APBB1 CDH10 ATP9A SCRN1 PDE6D ENOPH1 GKAP1 WNK1 FOXN2 UVRAG PEX1 USP48 KIF1B ULK2 DOCK9 PNPT1 USP16 ANKIB1 TMEM19 ST6GALNAC3 COBL RBM41 USF2 GRHPR TULP4 PCM1 TMCC2 DUSP7 LRRC8D SLC35A5 ATP8A1 EM…
NEURON_CAHOY ET AL	1e-10	3e-10	2.40506	1036	PDGFB MAP3K5 CRHBP CALN1 ADCY5 INPP1 CYS1 EGR3 GPR88 TNFAIP8L1 MAPRE2 OTUD7A FSTL5 TAC1 PCP4 RESP18 PTPRK NAV3 RASGRP2 HS3ST2 GTDC1 DSP RAB40B TIAM1 TMEM74 KCTD8 SPOCK3 FEZF2 PPP1R12B RPS6KL1 ATP13A2 PPM1H LY6H TRIM3 HS3ST5 NDUFA10 KCNMB4 DLG2 NCK2 PNOC CPNE5 TSPAN5 GRP PRKACB DNAJC6 PDE1A GABARAPL2 CYP46A1 PPP1R1B EGR4 RASGRF1 STOML1 GRIA3 TTC9B WSB2 SESTD1 LMO3 SLC25A22 AK5 SST FCHO1 CCL4 TESC …
ASTROCYTES_CAHOY ET AL	1e-10	4e-10	1.49593	1314	CLU ITM2C CTNND2 MAPK4 SORBS1 MYO6 GPM6B UTRN CTTN AGPAT3 PTPRF RETSAT TJP1 MYO10 ITPKB ALDH7A1 DTNA PNPLA7 NCOR1 IVD ACSS1 HIPK1 KLHL5 USP40 TMIE TBL1X TOR1AIP2 TRMT11 KCNJ10 NMNAT1 AK3 SEC63 ZBTB41 EVI5 MICALL2 PPIG NUDT12 NEO1 ATP1B2 CRTAP GPR37L1 RABEP1 IL6ST PSAT1 IQCE ARHGEF17 FBXL3 GPRC5B PKD2 HSDL2 PARP3 GOLGA1 BCKDHB TMEM30A AGL CAPN2 SLC23A2 PTAR1 SP1 DBT VCL SPEG AGT EEA1 PLCD4 ABHD10 …

## Sheet: 5ALA-
Cell types enriched in ALA negative	pval	padj	NES	size	leadingEdge
NEURON_CAHOY ET AL	0.000650249	0.00260099	1.33394	1036	STMN3 CD200 SAE1 HOOK2 NCALD REEP2 KLHDC8A CCBE1 PGM2L1 NRN1 NAT14 PCMT1 NTNG1 DBN1 GRIA4 ZIK1 PPP2R5C HPRT1 CHRM1 BBS4 ATP6V1D KHDRBS3 GAP43 MSRA SMARCA1 NDRG4 TTC9B UBE2B ARHGAP15 VGF TLK1 NPNT OCIAD2 EEF1A2 RAB3C MGST3 MGAT5B GNG2 LMO3 BEX4 SMPD3 CPNE7 CCNI OLFM2 CACNG3 NPTXR SLC17A6 SLC10A4 GOT1 EBF1 LCK FSD1 WDR54 OTUB1 GAD1 CDADC1 CHL1 CALM1 HPCAL4 RYR3 DPYSL3 KIF2A TACC2 USP11 NRSN2 PPP1R1…

## Sheet: 5ALA+
Cell types enriched in ALA negative	pval	padj	NES	size	leadingEdge
