# Supplementary material for: Spatially resolved transcriptomic profiles reveal unique defining molecular features of infiltrative 5ALA-metabolizing cells associated with glioblastoma recurrence
Source: Genome Med. 2023 Jul 11;15:48. doi: 10.1186/s13073-023-01207-1 (PMC10337060; doi:10.1186/s13073-023-01207-1)
Supplement: Supplementary file 9 — Additional file 9: Table S8. Enrichment of selected gene-signatures in DEGs with significantly altered exon and intron counts in 5ALA+ cells. [file 13073_2023_1207_MOESM9_ESM.xlsx]

## Sheet: 5ALA+ UP
Delta	Condition	pathway	pval	padj	log2err	ES	NES	size	leadingEdge	leadingEdge.symbol
Exon	5ALA+ vs. Core	TF	7.0831e-07	2.12493e-06	0.659444	0.945813	2.7392	8	4792, 9314, 2353, 1959, 5966, 3394	NFKBIA, KLF4, FOS, EGR2, REL, IRF8
Exon	5ALA+ vs. Core	GPM	6.63713e-06	9.95569e-06	0.610527	0.619316	2.5992	20	728, 3587, 79890, 64098, 25771, 5045, 3566, 2242, 1508, 10184, 4125	C5AR1, IL10RA, RIN3, PARVG, TBC1D22A, FURIN, IL4R, FES, CTSB, LHFPL2, MAN2B1
Exon	5ALA+ vs. Core	MTC	0.0130607	0.0130607	0.38073	0.572392	1.75605	9	4701, 6155, 84266, 4713, 4707, 5204, 1329, 64960, 1337	NDUFA7, RPL27, ALKBH7, NDUFB7, NDUFB1, PFDN5, COX5B, MRPS15, COX6A1
Exon	5ALA+ vs. Rim	TF	1.53747e-06	4.61242e-06	0.643552	0.934521	2.80157	8	9314, 4792, 2353, 1959, 5966, 3394	KLF4, NFKBIA, FOS, EGR2, REL, IRF8
Exon	5ALA+ vs. Rim	GPM	0.000538929	0.000808394	0.477271	0.470425	2.14014	20	728, 3587, 79890, 64098, 25771, 5045, 4125, 2242, 3566, 10184, 1508	C5AR1, IL10RA, RIN3, PARVG, TBC1D22A, FURIN, MAN2B1, FES, IL4R, LHFPL2, CTSB
Exon	5ALA+ vs. Rim	MTC	0.00933573	0.00933573	0.38073	0.563871	1.78835	9	4701, 6155, 4707, 84266, 4713, 5204, 1329, 64960, 1337	NDUFA7, RPL27, NDUFB1, ALKBH7, NDUFB7, PFDN5, COX5B, MRPS15, COX6A1
Exon	5ALA+ vs. Inv	GPM	2.52402e-10	7.57207e-10	0.814036	0.833394	3.37723	20	728, 3587, 79890, 64098, 1508, 284207, 3566, 4125, 5045, 2242, 2355, 25771, 10184, 10312, 8829	C5AR1, IL10RA, RIN3, PARVG, CTSB, METRNL, IL4R, MAN2B1, FURIN, FES, FOSL2, TBC1D22A, LHFPL2, TCIRG1, NRP1
Exon	5ALA+ vs. Inv	TF	8.79628e-07	1.31944e-06	0.659444	0.938695	2.79126	8	4792, 9314, 1959, 2353, 5966, 3394, 2355	NFKBIA, KLF4, EGR2, FOS, REL, IRF8, FOSL2
Exon	5ALA+ vs. Inv	MTC	0.0428211	0.0428211	0.321776	0.522747	1.62912	9	4701, 6155, 4713, 84266, 5204	NDUFA7, RPL27, NDUFB7, ALKBH7, PFDN5
Exon	5ALA+ vs. 5ALA-	Inf. Res	1e-10	2e-10		0.728207	3.1706	47	3569, 490, 3553, 4481, 8877, 3552, 3606, 4233, 114548, 558, 3656, 1236, 728, 9180, 1839, 3566, 23533, 5142, 4973, 64127, 23308, 3587, 1316, 1435, 6347, 3576, 4891, 4792, 3554	IL6, ATP2B1, IL1B, MSR1, SPHK1, IL1A, IL18, MET, NLRP3, AXL, IRAK2, CCR7, C5AR1, OSMR, HBEGF, IL4R, PIK3R5, PDE4B, OLR1, NOD2, ICOSLG, IL10RA, KLF6, CSF1, CCL2, CXCL8, SLC11A2, NFKBIA, IL1R1
Exon	5ALA+ vs. 5ALA-	Mesenchymal	1e-10	2e-10		0.613791	2.7743	74	4481, 4053, 9871, 7351, 27180, 64866, 5603, 2212, 2242, 7057, 1075, 728, 54796, 3566, 4627, 7045, 7006, 64127, 284119, 7226, 221, 9411, 4125, 1601, 272, 25816, 9473, 6768, 9123, 2022, 1508, 752, 5045, 3554, 1522, 79709, 6556, 4121, 5734, 6464, 51131, 55332, 8717, 10184, 5054, 9144, 5329	MSR1, LTBP2, SEC24D, UCP2, SIGLEC9, CDCP1, MAPK13, FCGR2A, FES, THBS1, CTSC, C5AR1, BNC2, IL4R, MYH9, TGFBI, TEC, NOD2, CAVIN1, TRPM2, ALDH3B1, ARHGAP29, MAN2B1, DAB2, AMPD3, TNFAIP8, THEMIS2, ST14, SLC16A3, ENG, CTSB, FMNL1, FURIN, IL1R1, CTSZ, COLGALT1, SLC11A1, MAN1A1, PTGER4, SHC1, PHF11, DRAM1, TRADD, LHFPL2, SERPINE1, SYNGR2, PLAUR
Exon	5ALA+ vs. 5ALA-	TNFA signaling	1e-10	2e-10		0.673463	3.2022	83	3569, 8013, 490, 23764, 3553, 9308, 2683, 10221, 8877, 1960, 3552, 8061, 57018, 4814, 3606, 5966, 4929, 10950, 2114, 23645, 5743, 2920, 1839, 10957, 150094, 127544, 11080, 9314, 5142, 4973, 23308, 960, 6351, 2355, 25816, 24145, 1316, 602, 1435, 6347, 80176, 8660, 4088, 4792	IL6, NR4A3, ATP2B1, MAFF, IL1B, CD83, B4GALT1, TRIB1, SPHK1, EGR3, IL1A, FOSL1, CCNL1, NINJ1, IL18, REL, NR4A2, BTG3, ETS2, PPP1R15A, PTGS2, CXCL2, HBEGF, PNRC1, SIK1, RNF19B, DNAJB4, KLF4, PDE4B, OLR1, ICOSLG, CD44, CCL4, FOSL2, TNFAIP8, PANX1, KLF6, BCL3, CSF1, CCL2, SPSB1, IRS2, SMAD3, NFKBIA
Exon	5ALA+ vs. 5ALA-	GPM	1.68282e-06	2.52423e-06	0.643552	0.75109	2.65883	20	4053, 25771, 79890, 2242, 728, 3566, 4627, 4125, 2355, 1601, 64098, 3587, 1508, 5045, 284207, 10184	LTBP2, TBC1D22A, RIN3, FES, C5AR1, IL4R, MYH9, MAN2B1, FOSL2, DAB2, PARVG, IL10RA, CTSB, FURIN, METRNL, LHFPL2
Exon	5ALA+ vs. 5ALA-	TF	0.0167623	0.0201148	0.352488	0.693137	1.78234	8	5966, 3394, 9314, 2355, 4792	REL, IRF8, KLF4, FOSL2, NFKBIA
Intron	5ALA+ vs. Core	Inf. Wound Res.	1e-10	3.5e-10		0.556739	2.87526	127	9308, 8676, 388121, 7850, 5649, 4929, 3553, 3552, 9595, 6262, 79895, 3656, 345557, 2683, 639, 3569, 3383, 27, 5329, 241, 57101, 5272, 146713, 3576, 4792, 55647, 8061, 196383, 5743, 3936, 1439, 121551, 4791, 85450, 10365, 728, 2995, 3909, 23764, 3554, 154664, 112616, 1839, 1520, 5734, 9630, 5008, 387882, 752, 4481, 94240, 11343, 2114, 3790, 3055, 5606, 3680, 8877, 4327, 115701, 1756, 6001, 6916, 7…	CD83, STX11, TNFAIP8L3, IL1R2, RELN, NR4A2, IL1B, IL1A, CYTIP, RYR2, ATP8B4, IRAK2, PLCXD3, B4GALT1, PRDM1, IL6, ICAM1, ABL2, PLAUR, ALOX5AP, ANO2, SERPINB9, RBFOX3, CXCL8, NFKBIA, RAB20, FOSL1, RILPL2, PTGS2, LCP1, CSF2RB, BTBD11, NFKB2, ITPRIP, KLF2, C5AR1, GYPC, LAMA3, MAFF, IL1R1, ABCA13, CMTM7, HBEGF, CTSS, PTGER4, GNA14, OSM, C12orf75, FMNL1, MSR1, EPSTI1, MGLL, ETS2, KCNS3, HCK, MAP2K3, IT…
Intron	5ALA+ vs. Core	TNFA signaling	1e-10	3.5e-10		0.59539	2.91629	83	9308, 4973, 6351, 4929, 8013, 3553, 3552, 24145, 3164, 25816, 4790, 2683, 3569, 3383, 5966, 23135, 5329, 9314, 4792, 8061, 5743, 5341, 6446, 4791, 1959, 10365, 4794, 1960, 1316, 23764, 23645, 1839, 467, 5142, 9516, 5734, 1326, 10221	CD83, OLR1, CCL4, NR4A2, NR4A3, IL1B, IL1A, PANX1, NR4A1, TNFAIP8, NFKB1, B4GALT1, IL6, ICAM1, REL, KDM6B, PLAUR, KLF4, NFKBIA, FOSL1, PTGS2, PLEK, SGK1, NFKB2, EGR2, KLF2, NFKBIE, EGR3, KLF6, MAFF, PPP1R15A, HBEGF, ATF3, PDE4B, LITAF, PTGER4, MAP3K8, TRIB1
Intron	5ALA+ vs. Core	Inf. Res	4.92445e-10	1.14904e-09	0.801216	0.654726	2.81464	47	4973, 29933, 3553, 3552, 3656, 4790, 23533, 3569, 114548, 3383, 3576, 4792, 10148, 728, 1316, 3554, 1839, 5142, 5734, 4481, 2769, 8877, 5724, 1236	OLR1, GPR132, IL1B, IL1A, IRAK2, NFKB1, PIK3R5, IL6, NLRP3, ICAM1, CXCL8, NFKBIA, EBI3, C5AR1, KLF6, IL1R1, HBEGF, PDE4B, PTGER4, MSR1, GNA15, SPHK1, PTAFR, CCR7
Intron	5ALA+ vs. Core	TF	0.000202131	0.000353729	0.518848	0.87691	2.23945	8	4790, 5966, 9314, 4792, 3394, 1959	NFKB1, REL, KLF4, NFKBIA, IRF8, EGR2
Intron	5ALA+ vs. Core	Mesenchymal	0.0272639	0.0318079	0.352488	0.298489	1.39621	74	4121, 54796, 25816, 5329, 10184, 1522, 4053, 728, 7006, 7226, 3554, 6768, 23075, 8792, 5734, 752, 4627, 2014, 4481, 2769, 26509, 64866, 9473	MAN1A1, BNC2, TNFAIP8, PLAUR, LHFPL2, CTSZ, LTBP2, C5AR1, TEC, TRPM2, IL1R1, ST14, SWAP70, TNFRSF11A, PTGER4, FMNL1, MYH9, EMP3, MSR1, GNA15, MYOF, CDCP1, THEMIS2
Intron	5ALA+ vs. Core	GPM	0.0325147	0.0325147	0.321776	0.458156	1.60038	20	79890, 10184, 4053, 728, 25771, 4627, 284207, 8829, 3566	RIN3, LHFPL2, LTBP2, C5AR1, TBC1D22A, MYH9, METRNL, NRP1, IL4R
Intron	5ALA+ vs. Rim	Inf. Wound Res.	1e-10	5.37787e-10		0.466539	2.49438	127	9308, 8676, 388121, 5649, 7850, 4929, 3553, 79895, 3552, 6262, 9595, 3656, 2683, 27, 345557, 3569, 639, 5329, 3383, 241, 146713, 4792, 8061, 196383, 5272, 4791, 1439, 3909, 154664, 3576, 55647, 3936, 5743, 5734, 57101, 23764, 728, 85450, 10365, 2995, 1520, 121551, 115701, 3790, 112616, 94240, 387882, 1756, 3680, 4481, 752, 4327, 3554, 79827, 3055, 9630, 11343	CD83, STX11, TNFAIP8L3, RELN, IL1R2, NR4A2, IL1B, ATP8B4, IL1A, RYR2, CYTIP, IRAK2, B4GALT1, ABL2, PLCXD3, IL6, PRDM1, PLAUR, ICAM1, ALOX5AP, RBFOX3, NFKBIA, FOSL1, RILPL2, SERPINB9, NFKB2, CSF2RB, LAMA3, ABCA13, CXCL8, RAB20, LCP1, PTGS2, PTGER4, ANO2, MAFF, C5AR1, ITPRIP, KLF2, GYPC, CTSS, BTBD11, ALPK2, KCNS3, CMTM7, EPSTI1, C12orf75, DMD, ITGA9, MSR1, FMNL1, MMP19, IL1R1, CLMP, HCK, GNA14, MG…
Intron	5ALA+ vs. Rim	TNFA signaling	1.53654e-10	5.37787e-10	0.826657	0.509318	2.42716	83	9308, 4973, 4929, 24145, 6351, 8013, 3553, 3552, 4790, 25816, 2683, 3164, 5966, 3569, 9314, 5329, 23135, 3383, 4792, 8061, 4791, 5341, 4794, 5743, 5734, 23645, 23764, 10365, 1316, 6446, 5142, 9516	CD83, OLR1, NR4A2, PANX1, CCL4, NR4A3, IL1B, IL1A, NFKB1, TNFAIP8, B4GALT1, NR4A1, REL, IL6, KLF4, PLAUR, KDM6B, ICAM1, NFKBIA, FOSL1, NFKB2, PLEK, NFKBIE, PTGS2, PTGER4, PPP1R15A, MAFF, KLF2, KLF6, SGK1, PDE4B, LITAF
Intron	5ALA+ vs. Rim	Inf. Res	2.74275e-06	6.39975e-06	0.627257	0.527631	2.29233	47	4973, 29933, 3553, 3552, 4790, 3656, 114548, 3569, 23533, 3383, 4792, 10148, 3576, 5734, 728, 1316, 5142, 4481, 1236, 5724, 3554	OLR1, GPR132, IL1B, IL1A, NFKB1, IRAK2, NLRP3, IL6, PIK3R5, ICAM1, NFKBIA, EBI3, CXCL8, PTGER4, C5AR1, KLF6, PDE4B, MSR1, CCR7, PTAFR, IL1R1
Intron	5ALA+ vs. Rim	TF	0.00356936	0.00499711	0.431708	0.771254	1.94127	8	4790, 5966, 9314, 4792, 3394, 1959	NFKB1, REL, KLF4, NFKBIA, IRF8, EGR2
Intron	5ALA+ vs. Rim	GPM	0.36478	0.425577	0.184706	0.29954	1.04605	20	79890, 10184, 4053, 728, 25771, 4627, 284207, 8829	RIN3, LHFPL2, LTBP2, C5AR1, TBC1D22A, MYH9, METRNL, NRP1
Intron	5ALA+ vs. Rim	Mesenchymal	0.717949	0.717949	0.271289	0.193459	0.895285	74	4121, 25816, 54796, 5329, 10184, 1522, 4053, 5734, 7006, 728, 8792, 23075, 6768, 7226, 2014, 26509, 4481, 752, 3554	MAN1A1, TNFAIP8, BNC2, PLAUR, LHFPL2, CTSZ, LTBP2, PTGER4, TEC, C5AR1, TNFRSF11A, SWAP70, ST14, TRPM2, EMP3, MYOF, MSR1, FMNL1, IL1R1
Intron	5ALA+ vs. Inv	Inf. Res	1e-10	2.33333e-10		0.692161	3.01279	47	29933, 3383, 4973, 4790, 3569, 3552, 3656, 3576, 3553, 23533, 114548, 3554, 728, 4792, 4233, 4481, 1316, 10148, 5734, 2769, 64127, 5142, 8877, 3678, 1236, 1839, 8767, 3566	GPR132, ICAM1, OLR1, NFKB1, IL6, IL1A, IRAK2, CXCL8, IL1B, PIK3R5, NLRP3, IL1R1, C5AR1, NFKBIA, MET, MSR1, KLF6, EBI3, PTGER4, GNA15, NOD2, PDE4B, SPHK1, ITGA5, CCR7, HBEGF, RIPK2, IL4R
Intron	5ALA+ vs. Inv	Inf. Wound Res.	1e-10	2.33333e-10		0.557183	2.8361	127	7850, 8676, 388121, 9308, 4327, 154664, 9595, 3383, 5329, 115701, 27, 3569, 3552, 8061, 3656, 4791, 5649, 79895, 3576, 2683, 241, 3553, 639, 55647, 345557, 3554, 4929, 728, 4792, 2995, 121551, 1439, 4481, 196383, 57101, 112616, 3936, 23764, 3909, 5734, 85450, 146713, 1520, 5272, 5743, 6262, 5606, 94240, 3790, 25890, 8877, 162394, 5008, 3055, 23213, 4688, 11343, 9630, 6916, 1756, 79827, 1839, 6282…	IL1R2, STX11, TNFAIP8L3, CD83, MMP19, ABCA13, CYTIP, ICAM1, PLAUR, ALPK2, ABL2, IL6, IL1A, FOSL1, IRAK2, NFKB2, RELN, ATP8B4, CXCL8, B4GALT1, ALOX5AP, IL1B, PRDM1, RAB20, PLCXD3, IL1R1, NR4A2, C5AR1, NFKBIA, GYPC, BTBD11, CSF2RB, MSR1, RILPL2, ANO2, CMTM7, LCP1, MAFF, LAMA3, PTGER4, ITPRIP, RBFOX3, CTSS, SERPINB9, PTGS2, RYR2, MAP2K3, EPSTI1, KCNS3, ABI3BP, SPHK1, SLFN5, OSM, HCK, SULF1, NCF2, MG…
Intron	5ALA+ vs. Inv	TNFA signaling	1e-10	2.33333e-10		0.633929	3.09605	83	9308, 25816, 24145, 3383, 5329, 8013, 4973, 4790, 3569, 3552, 8061, 4791, 2683, 23135, 5966, 3553, 4929, 4792, 6351, 1316, 23645, 1326, 4794, 23764, 5734, 1846, 5341, 9516, 80176, 9021, 9314, 5743, 5606, 5142, 7127, 10221, 8877, 3164, 467	CD83, TNFAIP8, PANX1, ICAM1, PLAUR, NR4A3, OLR1, NFKB1, IL6, IL1A, FOSL1, NFKB2, B4GALT1, KDM6B, REL, IL1B, NR4A2, NFKBIA, CCL4, KLF6, PPP1R15A, MAP3K8, NFKBIE, MAFF, PTGER4, DUSP4, PLEK, LITAF, SPSB1, SOCS3, KLF4, PTGS2, MAP2K3, PDE4B, TNFAIP2, TRIB1, SPHK1, NR4A1, ATF3
Intron	5ALA+ vs. Inv	Mesenchymal	1.72652e-06	3.02142e-06	0.643552	0.45189	2.08529	74	25816, 54796, 5329, 4121, 4053, 26509, 10184, 3554, 6768, 728, 64866, 7006, 4481, 7045, 1522, 8829, 2014, 5734, 8792, 2769, 64127, 23075, 9871, 4627, 7226, 3678, 9473	TNFAIP8, BNC2, PLAUR, MAN1A1, LTBP2, MYOF, LHFPL2, IL1R1, ST14, C5AR1, CDCP1, TEC, MSR1, TGFBI, CTSZ, NRP1, EMP3, PTGER4, TNFRSF11A, GNA15, NOD2, SWAP70, SEC24D, MYH9, TRPM2, ITGA5, THEMIS2
Intron	5ALA+ vs. Inv	GPM	0.000560782	0.000785095	0.477271	0.595237	2.01072	20	4053, 10184, 79890, 728, 284207, 8829, 25771, 4627, 3678, 3566	LTBP2, LHFPL2, RIN3, C5AR1, METRNL, NRP1, TBC1D22A, MYH9, ITGA5, IL4R
Intron	5ALA+ vs. Inv	TF	0.00520161	0.00606854	0.407018	0.766858	1.96475	8	4790, 5966, 4792, 3394, 9314	NFKB1, REL, NFKBIA, IRF8, KLF4
Intron	5ALA+ vs. 5ALA-	Inf. Res	0.00110012	0.00472234	0.45506	0.443054	1.82796	47	490, 29933, 3656, 4790, 3678, 10148, 3949, 1839, 8767, 5724, 4973, 8877, 4481, 5142, 64127, 8578, 7097, 3569, 2769, 4233	ATP2B1, GPR132, IRAK2, NFKB1, ITGA5, EBI3, LDLR, HBEGF, RIPK2, PTAFR, OLR1, SPHK1, MSR1, PDE4B, NOD2, SCARF1, TLR2, IL6, GNA15, MET
Intron	5ALA+ vs. 5ALA-	Mesenchymal	0.0339089	0.0791208	0.321776	0.28709	1.26701	74	6768, 4053, 2014, 3678, 4121, 7045, 26509, 23075, 7226, 9871, 4481, 4124, 1522, 25816, 752, 6813, 9208, 54796, 64127, 64866, 2359, 5329, 8829, 10184, 7097, 4245, 2769, 7057	ST14, LTBP2, EMP3, ITGA5, MAN1A1, TGFBI, MYOF, SWAP70, TRPM2, SEC24D, MSR1, MAN2A1, CTSZ, TNFAIP8, FMNL1, STXBP2, LRRFIP1, BNC2, NOD2, CDCP1, FPR3, PLAUR, NRP1, LHFPL2, TLR2, MGAT1, GNA15, THBS1
Intron	5ALA+ vs. 5ALA-	TNFA signaling	0.0539929	0.0944876	0.321776	0.255629	1.16365	83	80176, 490, 8061, 23135, 4790, 3949, 23586, 4794, 9308, 1839, 2683, 8767, 4973, 4791, 8877, 329, 25816, 2114, 5142, 8660, 5329, 1846, 7097	SPSB1, ATP2B1, FOSL1, KDM6B, NFKB1, LDLR, DDX58, NFKBIE, CD83, HBEGF, B4GALT1, RIPK2, OLR1, NFKB2, SPHK1, BIRC2, TNFAIP8, ETS2, PDE4B, IRS2, PLAUR, DUSP4, TLR2
Intron	5ALA+ vs. 5ALA-	GPM	0.180095	0.252133	0.231127	0.374219	1.2361	20	4053, 3678, 79890, 25771, 8829, 10184, 4245	LTBP2, ITGA5, RIN3, TBC1D22A, NRP1, LHFPL2, MGAT1
Intron	5ALA+ vs. 5ALA-	Inf. Wound Res.	0.259197	0.302396	0.203509	0.222461	1.13806	127	162394, 388121, 8061, 3656, 3790, 27, 9595, 9308, 1839, 2683, 9056, 79827, 241, 55647, 4327, 387882, 79895, 112616, 639, 2995, 1439, 5272, 2803, 4791, 8877, 6262, 4481, 6518, 752, 2114, 8676, 5329, 11343, 6645, 5649, 7097	SLFN5, TNFAIP8L3, FOSL1, IRAK2, KCNS3, ABL2, CYTIP, CD83, HBEGF, B4GALT1, SLC7A7, CLMP, ALOX5AP, RAB20, MMP19, C12orf75, ATP8B4, CMTM7, PRDM1, GYPC, CSF2RB, SERPINB9, GOLGA4, NFKB2, SPHK1, RYR2, MSR1, SLC2A5, FMNL1, ETS2, STX11, PLAUR, MGLL, SNTB2, RELN, TLR2
Intron	5ALA+ vs. 5ALA-	TF	0.838284	0.838284	0.0782955	0.285958	0.698766	8	4790, 3394	NFKB1, IRF8

## Sheet: 5ALA+ down
Delta	Condition	pathway	pval	padj	log2err	ES	NES	size	leadingEdge	leadingEdge.symbol
Intron	5ALA+ vs. Core	MTC	0.00320641	0.00448898	0.431708	-0.772007	-1.71267	9	4707, 4713, 5204, 4701, 64960, 1337, 1329, 84266, 6155	NDUFB1, NDUFB7, PFDN5, NDUFA7, MRPS15, COX6A1, COX5B, ALKBH7, RPL27
Intron	5ALA+ vs. Inv	MTC	0.00807795	0.00807795	0.38073	-0.734218	-1.61596	9	4707, 4713, 5204, 64960, 1329, 1337, 4701, 6155, 84266	NDUFB1, NDUFB7, PFDN5, MRPS15, COX5B, COX6A1, NDUFA7, RPL27, ALKBH7
Intron	5ALA+ vs Rim	MTC	0.00234319	0.00410058	0.431708	-0.778231	-1.69039	9	4707, 4713, 5204, 4701, 64960, 1329, 1337, 84266, 6155	NDUFB1, NDUFB7, PFDN5, NDUFA7, MRPS15, COX5B, COX6A1, ALKBH7, RPL27
Intron	5ALA+ vs 5ALA-	MTC	0.00134924	0.00472234	0.45506	-0.800347	-1.78639	9	5204, 4713, 6155, 4701, 1329, 1337, 4707	PFDN5, NDUFB7, RPL27, NDUFA7, COX5B, COX6A1, NDUFB1
