# Supplementary material for: Spatially resolved transcriptomic profiles reveal unique defining molecular features of infiltrative 5ALA-metabolizing cells associated with glioblastoma recurrence
Source: Genome Med. 2023 Jul 11;15:48. doi: 10.1186/s13073-023-01207-1 (PMC10337060; doi:10.1186/s13073-023-01207-1)
Supplement: Supplementary file 10 — Additional file 10: Table S9. Enrichment of stemness associated gene-signatures. [file 13073_2023_1207_MOESM10_ESM.xlsx]

## Sheet: Tumor Core
Stemness associated gene set enriched in tumor core	pval	padj	log2err	ES	NES	size	leadingEdge
SHATS_CONSENSUS	1.65569e-06	7.17466e-06	0.643552	0.496976	2.19587	55	IGFBP4 HMGB2 PUS7 PTTG1 CDKN3 CEP55 LAMB2 SNRPA1 HMMR KIF11 ZWINT BIRC5 ECT2 RAD51AP1 CENPF CDC20 MAD2L1 ASPM UBE2C FBXO5 KIF14 KIF15 KIF2C MCAM CCNB2 CCNB1 MELK ESPL1 NUSAP1 TALDO1 MCM6 NEK2 KIF23 KIF4A SMC2 GTPBP4 BUB1 TPX2 FEN1 RACGAP1 ISG20L2 ATAD2
BHATTACHARYA_HESC	4.99699e-06	1.62402e-05	0.610527	0.48961	2.18819	57	NPM1 SERPINH1 DDX21 HMGB2 SMS RPLP0 CRABP2 KPNA2 GAL HMGA1 HDAC2 PTTG1 IMPDH2 RPL7 IFITM1 RSL24D1 CDK1 SNRPF RPL24 CCT8 ARL5B PODXL AURKB RCC2 IDH1 NANOG TK1 GDF3 SET RPL6 MAD2L2 CCNB1 DNTTIP1 RPS24
STEM CELL GENE SET (PALMER ET AL. 2012)	6.95398e-05	0.000180803	0.538434	0.348094	1.7469	109	GBE1 RPF2 OSTC ROR1 XPOT CHEK2 ATP11C HESX1 SAT1 FST RARS2 BOD1 HDAC2 SNX8 UTP6 CTSS NPR3 TNFSF10 RSAD2 CENPH MED20 TEX10 HLA-DQA1 CTSH NDC80 DPH3 KIF11 RIOK2 HAUS1 ADH5 MCM10 ASCC3 CPSF3 CDC25A TBC1D16 PTPRC GDF3 TSHZ2 DHX15 MTHFD1L IL10RA DEPDC1B MIS18A CCNB1 RRAS2 ORC1 CD53 NUSAP1 TRIM24 XRCC5 MCM6 ALX1 CCNG1 ABCG1 UGGT2 KIF23 HAT1 TET1 EIF2AK4 ARHGDIB
KIM_MYC	1e-10	1.3e-09		0.513084	2.11391	188	FNBP4 DNAJB4 NPM1 TCEA1 TAF12 SP1 BCLAF1 CCNI PRPF38B MIS12 EEF1A1 CBX3 CNOT4 XRN2 DBR1 CCT4 TAF15 TNPO3 RNMT THRAP3 ZCCHC7 MAT2B FUBP1 NMD3 MRPS30 DNAJC8 CANX BRD8 IFRD1 SUZ12 MRPL50 BIRC2 G3BP1 PAICS RPS14 RAD50 PNN NACA RPS13 RPL14 SOS1 CSTF1 DBT RPL32 CETN3 RPL7 NEK8 CNIH4 MMAA ANP32B WEE1 LDHA ST13 ILF3 INCENP CLNS1A SMARCAD1 OSGEP GMPS JMJD6 DHX9 UNG ADH5 ATAD3A RPS27L COG4 NDOR1 CCT8 SESN2…
BENPORATH_NANOG	0.011327	0.0294502	0.38073	0.328669	1.37556	225	APH1A BCLAF1 GXYLT1 DDX18 ANKRD49 CCDC93 CBX3 EXOC4 GATAD1 CAPZA2 EIF4B HESX1 ATG4C DNAJC8 GNA13 ACADM APOA2 DPM1 ETNK1 CNBP FBXW11 C16orf72 FOXO3 EIF2AK3 CSTF1 ARIH1 DVL2 CETN3 DHDDS DUSP12 GLG1 DMXL1 CNOT8 ATP6V1G1 ABCB7 CDK6 ANP32B GOLGA4 EIF3F GPR108 ADAR EXTL2 CAND1 ABCF2 BUB3 ANKMY2 ASXL1 FOXJ2 CDC16 EIF3D BAG5 C20orf96 FXR1 COG7 AK4 GART DSCC1 CCT7 DIDO1 DNAJB14 DDX23 DDX39A GTPBP3 AKIRIN1…
BENPORATH_SOX2	0.00595034	0.0193386	0.407018	0.337613	1.41096	222	FAM76B C1orf174 KDM3A APH1A BCLAF1 GXYLT1 INO80D MYNN HNRNPA2B1 HDAC9 CCDC93 CBX3 CAPZA2 HESX1 KLF5 MTF2 MAT2B HNRNPA1 CTH MED17 GNA13 HNRNPC MTM1 G3BP1 FBXW11 ARIH1 DVL2 KIAA1143 CETN3 DHDDS DUSP12 CNOT8 KAT6A ATP6V1G1 ABCB7 CDK6 ANP32B MLLT10 ILF3 EIF3F ADAR MRPS31 CAPRIN1 ABCF2 BUB3 HNRNPUL1 EAPP CLP1 CDK12 FOXJ2 IGF2BP3 C20orf96 KPNA3 HDAC2 DSCC1 DIDO1 KNTC1 DDX39A MRPS27 GTPBP3 IFI16 MEX3C I…
ES1	0.00226556	0.00981743	0.431708	0.338419	1.42509	257	SLC6A8 NPM1 PRPF40A MRS2 ROBO1 PUS7 PRKD3 DDX18 SERBP1 NUP107 RNF138 HMGB3 ANGEL2 HESX1 TNPO3 MTF2 FUBP1 ZNF398 KLHL7 PNISR PRDM14 IDO1 G3BP1 DNAJB6 PAICS NOC3L ESF1 POLR3G SRSF7 PNN NASP PDCD2 DEK LYPLA1 USO1 WDR12 PRMT3 NOP16 CSE1L GMNN IFITM1 CAPRIN2 TMX1 NFYB RCC2 ARL5B PAK1IP1 PARP1 SALL1 ILF3 BRWD1 PTPN2 MED14 TIA1 NCAPG2 BUB3 UNG PDK1 AUTS2 ACTA1 AZIN1 RARRES2 ETV1 ZNF195 IGF2BP3 WDHD1 USP…

## Sheet: Tumor Rim
Stemness associated gene set enriched in tumor rim	pval	padj	log2err	ES	NES	size	leadingEdge
SMITH_HUMAN EPITHELIAL ASC	0.00399836	0.0129947	0.407018	0.530003	1.54793	38	TMEM237 PTPN14 NUP107 SAMD5 PKD2 NASP NOL9 SUPT16H DDX46 TMEM201 CDK6 SLC41A1 DNMT1 GMPS PRNP NKRF ILF3
BENPORATH_NANOG	1.66155e-05	0.000108001	0.57561	0.429449	1.40289	225	CLIC4 DPYSL2 ABCF2 ETNK1 CDK14 CNN3 AK3 APLP2 GLG1 ARHGAP1 EXOC4 DDX23 ANKMY2 ADAR CALD1 FGFR1 ARF4 CAND1 GATAD1 AP3B1 GRPEL2 CDH1 BAG5 GORASP2 AK4 GRHL2 DPAGT1 CCDC93 CYP1B1 CDH2 GJA1 EXD2 EXTL2 GTF2E1 EPS15L1 ASXL1 GART C20orf194 CAPZA2 ARF3 ASB1 DPYSL3 EIF2AK3 COG7 DDX18 ATP6V1A DTNA COL12A1 ACTR1B FBLN1 CDYL ACADM C1orf21 DMXL1 HEXIM2 CDK6 EIF4ENIF1 CPT1A ANKRD49 GSTCD GTPBP3 AKIRIN2 FOXO3 AR…
KIM_MYC	7.47357e-06	9.71565e-05	0.610527	0.400125	1.73792	188	RDH10 SLC33A1 DPH3 ADH5 ZCCHC7 RNF4 MRPL17 DBR1 CRAT MIS12 ANKRD10 RAD50 THRAP3 PSME3 EIF2S2 SAMD10 SESN2 SLC3A2 CCT8 NDOR1 BIRC2 SS18 SLBP SUZ12 CSNK2A1 MAN1B1 UBE2I LDHA LMLN FN1 DLST EWSR1 NOLC1 DERL2 DHX9 TCEA1 ZDHHC16 NEK8 GMPS CBX3 SUPV3L1 STX12 KLF16 INCENP PNN HSD17B12 MMP14 LAPTM4A SLC9A8 SEH1L MCM6 CCT7 LMAN2 FNBP4 ZBTB37 PRPF38B SOS1 PPCS UNG GTF2IRD2B CANX WEE1 CFL1 MRPL18 SNRPA EIF5A…
BHATTACHARYA_HESC	0.00152325	0.00990112	0.45506	0.354018	1.71529	57	SERPINH1 KPNA2 GAL HMGA1 SMS GDF3 PODXL PTTG1 CRABP2 NPM1 HMGB2 DDX21 CDK1 RPLP0 CYP26A1 TK1 IMPDH2 HDAC2 SNRPF NANOG AURKB

## Sheet: Invasive Region
Stemness associated gene set enriched in invasive region	pval	padj	log2err	ES	NES	size	leadingEdge
BENPORATH_NANOG	4.57427e-05	0.000297328	0.557332	0.409524	1.39598	225	DPYSL2 DTNA ARHGAP1 AK3 ASB1 GORASP2 EXD2 ADAR C20orf194 ACADM GLG1 AP3B1 FBXW11 ABCF2 ETNK1 CLIC4 CCDC93 GTF2E1 GATAD1 EXOC4 GRPEL2 DDX18 FGFR1 ANKMY2 CAND1 CDH1 COG7 GJA1 ASXL1 DDX23 CDC14B ANKRD49 BAG5 EGLN3 EIF4ENIF1 AKIRIN1 GAS2L1 GSTCD DPAGT1 CDYL ATG13 CLDN6 DMXL1 APLP2 EPS15L1 EXTL2 CNN3 CDK17 GDE1 AK4 GART FOXJ2 HEY2 ATG4C ARIH1 CDK14 EIF2AK3 C1orf21 ADAL GLUD1 CPT1A HESX1 FOXO3 FEZ1 ACT…
BENPORATH_SOX2	0.000439743	0.00190555	0.498493	0.402147	1.3709	222	DPYSL2 ALDH7A1 DTNA FICD ARHGAP1 KLHL5 AK3 KPNA3 FAM98A IWS1 ADAR C20orf194 KIAA1143 AP3B1 HSD17B12 FBXW11 CDC42BPA ABCF2 CAPRIN1 CLIC4 CCDC93 HNRNPA2B1 FGFR1 HEPH APP GJA1 CDC14B HIF1AN KIF20B INO80D EGLN3 AKIRIN1 LRFN3 MAPRE2 DPAGT1 CDYL MYNN ACOX1 FAM168A KCNN2 CDK17 MCTS1 KDM3A FOXJ2 MORF4L1 ARIH1 GSK3B CDK14 HMG20A C1orf21 ABLIM1 CPT1A HESX1 CRIM1 HDAC9 FEZ1 ACTR1A ILF3 HEXIM2 HSPA13 LSG1 CA…
SMITH_HUMAN EPITHELIAL ASC	0.00733082	0.0238252	0.407018	0.49639	1.50289	38	PKD2 SLC41A1 NOL9 DDX46 NASP SAMD5 TMEM237 TMEM201 PTPN14 SUPT16H NUP107 PRNP ILF3 CDK6 GMPS JAM3 DNMT1 KANK1 RCC2 NKRF
KIM_MYC	0.0109852	0.0357018	0.38073	0.401787	1.23518	188	ADH5 BRD8 RAD50 STX12 MMAA UBQLN4 THRAP3 PSAT1 TCEA1 EWSR1 DHX9 ARV1 MIS12 NMD3 SAMD10 PSME3 NOLC1 LMLN CCT7 HSD17B12 PRPF38B ANKRD10 SOS1 SS18 DNAJC8 ZCCHC7 CLNS1A NEK8 PNN ATIC SUZ12 ST13 KIN ZDHHC16 FNBP4 DPH3 DBR1 INCENP UBE2I RNF4 FUBP1 CSNK2A1 CCNI PRPF19 CRAT PPCS SLC33A1 CNIH4 SLBP DLST EIF2S2 ALAD RDH10 LRSAM1 ADHFE1 TIAL1 CCT8 SLC9A8 MAT2B RNF41 ZMYND12 NPM1 SEH1L EEF1A1 ATAD3A NDOR1 SN…

## Sheet: 5ALA-
Stemness associated gene set enriched in 5ALA+ cells	pval	padj	log2err	ES	NES	size	leadingEdge
KIM_MYC	0.0007526	0.00351214	0.477271	0.310322	1.66842	188	TCEA1 RPL7 CNIH4 RANBP1 NPM1 EIF2S2 AURKB SNRPA1 EIF5A EXOSC1 CCNI ANP32B UBE2I WEE1 ERH CCT7 CDT1 RDH10 BRD8 RRM2 MMAA ARV1 EEF1A1 MRPL18 NACA RPL14 MCM5 COX5A SNRPE ATAD2 SAMD10 RPS19 MRPL36 STX12 MIS12 DERL2 NMD3 MAF1 KIN PLK4 MAT2B RPL32 MRPL17 ADH5 TAF12 RPS14 LRSAM1 CLNS1A RPS27L TUBA3C ATIC PRPF19 PSME3 CCND1 SUZ12 RPS13 MYO1G TRIP13 COX8A STC2 IMP4 NOLC1 RPLP1 PPCS SLBP CLPP ADSL HMGA1 CB…

## Sheet: 5ALA+
Stemness associated gene set enriched in 5ALA- cells	pval	padj	log2err	ES	NES	size	leadingEdge
